# Supplementary material for: Heteromultivalency enables enhanced detection of nucleic acid mutations
Source: Springer Nature journal article supplement (doi:10.1038/s41557-023-01345-4), 2023-10-26
Supplement: MOESM1 [file 41557_2023_1345_MOESM1_ESM.pdf]

# Heteromultivalency enables enhanced detection of nucleic acid mutations

---

In the format provided by the authors and unedited

## Table of Contents

|                                                                                                                                                                               |    |
|-------------------------------------------------------------------------------------------------------------------------------------------------------------------------------|----|
| <b>Materials</b> .....                                                                                                                                                        | 2  |
| <b>Supplementary Figure 1.</b> Description of targets and NUPACK predictions of target secondary structure.....                                                               | 5  |
| <b>Supplementary Figure 2.</b> Synthesis and purification of Atto647N-labeled targets . . . . .                                                                               | 7  |
| <b>Supplementary Figure 3.</b> Mass spectrometry characterization of Atto647N-labeled targets . . . . .                                                                       | 9  |
| <b>Supplementary Figure 4.</b> Synthesis of DNA-functionalized silica particles . . . . .                                                                                     | 16 |
| <b>Supplementary Figure 5.</b> Flow cytometry gating strategy to isolate singlet beads for analysis . . . . .                                                                 | 17 |
| <b>Supplementary Figure 6.</b> Fluorescence microscopy images of beads hybridized to target . . . . .                                                                         | 18 |
| <b>Supplementary Table 1.</b> Average median fluorescence intensity $\pm$ standard error of the mean values for all bead combinations binding no spacer G12C target . . . . . | 19 |
| <b>Supplementary Table 2.</b> Average median fluorescence intensity $\pm$ standard error of the mean values for all bead combinations binding no spacer WT target . . . . .   | 20 |
| <b>Supplementary Table 3.</b> Average discrimination factor $\pm$ standard error of the mean values for all bead combinations binding no spacer targets . . . . .             | 21 |
| <b>Supplementary Table 4.</b> Average cooperativity factor $\pm$ standard error of the mean values for all bead combinations binding no spacer G12C target . . . . .          | 22 |

## Materials

### Oligonucleotide Sequences and Modifications

All oligonucleotides were custom synthesized by Integrated DNA Technologies (Coralville, IA). The table below includes the names and sequences for all oligonucleotides used in this work. The structures of each of the oligonucleotide modifications are also included below.

| Name                              | Sequence (5' to 3')                     |
|-----------------------------------|-----------------------------------------|
| <b>7S</b>                         | /5ThioMC6-D/TTTTTTTTTTACAAGCT           |
| <b>8S</b>                         | /5ThioMC6-D/TTTTTTTTTTCACAAGCT          |
| <b>9S</b>                         | /5ThioMC6-D/TTTTTTTTTTCCACAAGCT         |
| <b>10S</b>                        | /5ThioMC6-D/TTTTTTTTTTGCCACAAGCT        |
| <b>11S</b>                        | /5ThioMC6-D/TTTTTTTTTTTCGCCACAAGCT      |
| <b>4T</b>                         | /5ThioMC6-D/TTTTTTTTTTTCCAA             |
| <b>5T</b>                         | /5ThioMC6-D/TTTTTTTTTTTCCAAC            |
| <b>6T</b>                         | /5ThioMC6-D/TTTTTTTTTTTCCAAC            |
| <b>7T</b>                         | /5ThioMC6-D/TTTTTTTTTTTCCAACT           |
| <b>8T</b>                         | /5ThioMC6-D/TTTTTTTTTTTCCAACTA          |
| <b>9T</b>                         | /5ThioMC6-D/TTTTTTTTTTTCCAACTAC         |
| <b>10T</b>                        | /5ThioMC6-D/TTTTTTTTTTTCCAACTACC        |
| <b>no spacer G12C</b>             | TGGTAGTTGGAGCTTGTGGCGTAGG/3AmMO/        |
| <b>no spacer WT</b>               | TGGTAGTTGGAGCTGGTGGCGTAGG/3AmMO/        |
| <b>internal short spacer G12C</b> | TGGTAGTTGG/iSp9/AGCTTGTGGCGTAGG/3AmMO/  |
| <b>internal short spacer WT</b>   | TGGTAGTTGG/iSp9/AGCTGGTGGCGTAGG/3AmMO/  |
| <b>internal long spacer G12C</b>  | TGGTAGTTGG/iSp18/AGCTTGTGGCGTAGG/3AmMO/ |
| <b>internal long spacer WT</b>    | TGGTAGTTGG/iSp18/AGCTGGTGGCGTAGG/3AmMO/ |
| <b>terminal short spacer G12C</b> | /5Sp9/TGGTAGTTGGAGCTTGTGGCGTAGG/3AmMO/  |
| <b>terminal short spacer WT</b>   | /5Sp9/TGGTAGTTGGAGCTGGTGGCGTAGG/3AmMO/  |
| <b>terminal long spacer G12C</b>  | /5Sp18/TGGTAGTTGGAGCTTGTGGCGTAGG/3AmMO/ |
| <b>terminal long spacer WT</b>    | /5Sp18/TGGTAGTTGGAGCTGGTGGCGTAGG/3AmMO/ |
| <b>3' thiol 8T</b>                | CCAACACTTTTTTTTTTT/3ThioMC3-D/          |
| <b>3' thiol 8S</b>                | CACAAGCTTTTTTTTTTT/3ThioMC3-D/          |
| <b>3' thiol 9S</b>                | CCACAAGCTTTTTTTTTTT/3ThioMC3-D/         |
| <b>5' thiol 8S L19F</b>           | /5ThioMC6-D/TTTTTTTTTTTCGTGAAGG         |
| <b>5' thiol 9S L19F</b>           | /5ThioMC6-D/TTTTTTTTTTTCGTGAAGGC        |
| <b>G12C/L19F</b>                  | AGCTTGTGGCGTAGGCAAGAGTGCCTTCACG/3AmMO/  |
| <b>WT/L19F</b>                    | AGCTGGTGGCGTAGGCAAGAGTGCCTTCACG/3AmMO/  |

|                                      |                                                                                                         |
|--------------------------------------|---------------------------------------------------------------------------------------------------------|
| <b>G12C/WT</b>                       | AGCTTGTGGCGTAGGCAAGAGTGCCTTGACG/3AmMO/                                                                  |
| <b>WT/WT</b>                         | AGCTGGTGGCGTAGGCAAGAGTGCCTTGACG/3AmMO/                                                                  |
| <b>8S Q498R</b>                      | GGTCGGAATTTTTTTTTT/3ThioMC3-D/                                                                          |
| <b>9S Q498R</b>                      | GGGTCGGAATTTTTTTTTT/3ThioMC3-D/                                                                         |
| <b>8S Y505H</b>                      | /5ThioMC6-D/TTTTTTTTTTTGGTGACC                                                                          |
| <b>9S Y505H</b>                      | /5ThioMC6-D/TTTTTTTTTTTGGTGACCA                                                                         |
| <b>complement to 29 nt Omicron</b>   | /5ThioMC6D/TTTTTTTTTTTGGTGACCAACACCATAAGTG<br>GGTCGGAA                                                  |
| <b>29 nt Omicron</b>                 | TTCCGACCCACTTATGGTGTGGTCCACCA/3AmMO/                                                                    |
| <b>29 nt Original</b>                | TTCCAACCCACTAATGGTGTGGTACCA/3AmMO/                                                                      |
| <b>29 nt Alpha</b>                   | TTCCAACCCACTTATGGTGTGGTACCA/3AmMO/                                                                      |
| <b>88 nt Omicron</b>                 | /5AmMC6/AGGTTTTAATTGTTACTTTCTTTACGATCATA<br>TAGTTTCCGACCCACTTATGGTGTGGTCCACCAACCAT<br>ACAGAGTAGTAGTACTT |
| <b>88 nt Original</b>                | /5AmMC6/AGGTTTTAATTGTTACTTTCTTTACAATCATA<br>TGGTTTCCAACCCACTAATGGTGTGGTACCAACCAT<br>ACAGAGTAGTAGTACTT   |
| <b>amine-modified forward primer</b> | /5AmMC6/AGGTTTTAATTGTTACTTTCTTTAC                                                                       |
| <b>reverse primer</b>                | AAGTACTACTACTCTGTATGGTTG                                                                                |

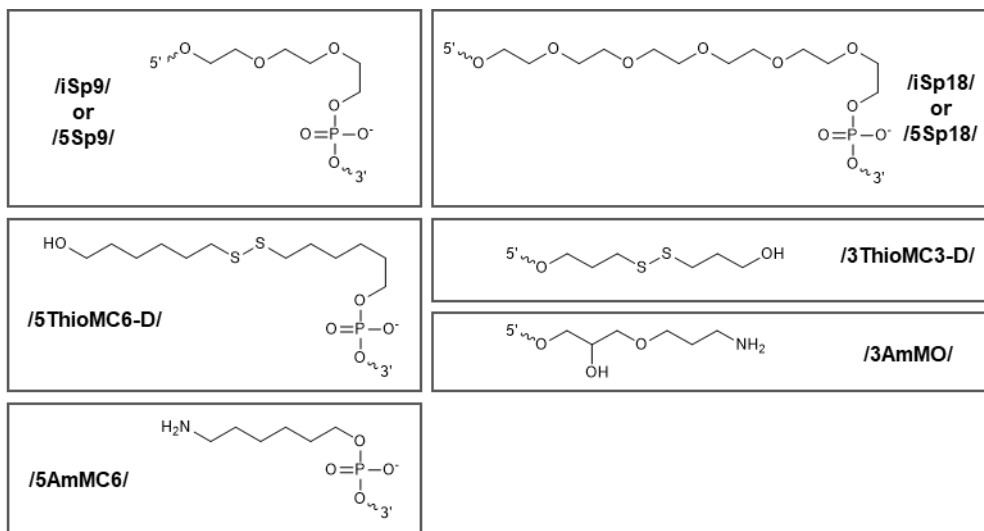

## Reagents

5  $\mu$ m aminated silica beads (Cat# SA06N) were purchased from Bangs Laboratory (Fishers, IN). Dri-solv methylsulfoxide (Cat# MX1457-7) was purchased from EMD Millipore (Burlington, MA). Potassium hydroxide (Cat# 221473), sodium bicarbonate (Cat#S6014), acetonitrile (Cat# 34998), and Atto647N NHS ester (Cat#18373-1MG-F) were purchased from Sigma-Aldrich (St. Louis, MO). 20x TE buffer (Cat# 42020325-2) was purchased from bioWORLD (Dublin, OH). Bond-Breaker TCEP (Tris(2-carboxyethyl)phosphine hydrochloride) solution, Neutral pH (Cat#77720), GeneAmp Fast PCR Master Mix (2x) (Cat# 4359187), High-Capacity cDNA Reverse Transcription kit (Cat# 4368814), Quant-IT Oligreen ssDNA reagent (Cat# O7582), SMCC (succinimidyl 4-(N-maleimidomethyl)cyclohexane-1-carboxylate) (Cat#22360), sulfo-NHS-acetate (Cat#26777), and Tween20 (Cat# BP337) were purchased from Thermo Fisher Scientific (Waltham, MA). Saline sodium citrate (SSC) buffer (Cat# AM9763) was purchased

from Ambion (Austin, TX). Triethylammonium acetate (Cat# 60-4110-57) was purchased from Glen Research (Sterling, VA). QIAamp Viral RNA mini kit (Cat# 52904) was purchased from Qiagen (Hilden, Germany). 30% Acrylamide/Bis Solution 29:1 (Cat# 1610156) was purchased from Bio-Rad (Hercules, CA). Heat-inactivated SARS-CoV-2 and human corona (229E, OC43) virus samples at known concentrations were provided by the NIH RADx-Radical Data Coordination Center (DCC) at the University of California San Diego and BEI Resources. Heat-inactivated SARS-CoV-2 Isolate hCoV-19/USA/CA-SEARCH-59467/2021 (Lineage BA.1; Omicron Variant) was contributed by Dr. Aaron Carlin and the UCSD CALM and EXCITE laboratories.

### **Consumables**

96-well white flat bottom polystyrene microplates (Cat# 3912) were purchased from Corning (Corning, NY). P2 size exclusion gel (Cat#1504118) and P4 size exclusion gel (Cat# #1504124) was purchased from Bio-Rad (Hercules, CA). Nanosep MF centrifugal devices (Cat# ODM02C35) were purchased from Pall Laboratory.

### **Equipment**

The major equipment that was used in this study includes: CytoFLEX V0-B3-R1 flow cytometer equipped with a 488 nm and 638 nm laser (Beckman coulter), Nanodrop 2000 UV-Vis Spectrophotometer (Thermo Scientific), Barnstead nanopure water purifying system (Thermo Fisher), 5424 R centrifuge (Eppendorf), Synergy H1 plate reader (Biotek), high-performance liquid chromatography 1100 (Agilent) with AdvanceBio Oligonucleotide C18 column (653950-702, 4.6x 150 mm, 2.7  $\mu$ m) (Agilent), LTQ Orbitrap Velos mass spectrometer (Thermo Scientific), T100 thermal cycler (Bio-Rad), iBright FL1500 Imaging System (Thermo Fisher Scientific), Galaxy mini tabletop centrifuge (VWR), Rebel Brightfield Microscope (ECHO), and Nikon Ti2-E motorized research microscope equipped with SOLA SE II 365 Light Engine, Photometrics Prime 95B-25mm Back-illuminated sCMOS camera, and CF-L AT Cy5/Alexa 647/Draq 5 filter set.

**Supplementary Figure 1. Description of targets and NUPACK predictions of target secondary structure.**

(A) Scheme describing the DNA sequence (NCBI Reference Sequence: NG\_007524.2) and amino acid sequence (NCBI Reference Sequence: NP\_001356715.1) of the first 20 amino acids of human KRAS protein. The location of the no spacer targets used in this work are shown in red, with the G12C mutated codon shown in blue. (B and C) Predictions for the secondary structures of the no spacer G12C (B) and WT (C) targets generated using NUPACK. In the illustration on the left, the circle color of each nucleotide refers to the identity of each nucleobase. In the illustration on the right, the circle color of each nucleotide refers to the probability that each nucleotide is bound at equilibrium if it is shown bound or unbound if it is shown unbound. The black arrows refer to the position of the G12C mutation in the target sequence. (D) The location of the G12C/L19F targets used in this work are shown in red, with the G12C and L19F mutated codons shown in blue. (E, F, G, and H) Predictions for the secondary structures of the G12C/L19F (E), WT/L19F (F), G12C/WT (G), and WT/WT (H) targets generated using NUPACK. The black arrows refer to the position of the G12C and L19F mutations in the target sequence. (I) Scheme describing the DNA sequence (NCBI Reference Sequence: NC\_045512.2) and amino acid sequence (NCBI Reference Sequence: YP\_009724390.1) of amino acids 497-506 of SARS-CoV-2 spike protein. The location of the Omicron/Original/Alpha targets used in this work are shown in red, with the Q498R, N501Y, and Y505H mutated codons shown in blue. (J, K, L, M, and N) Predictions for the secondary structures of the 29 nt Omicron (J), 29 nt Original (K), 29 nt Alpha (L), 88 nt Original (M), and 88 nt Omicron (N) targets generated using NUPACK. The black arrows refer to the position of the Q498R, N501Y, and Y505 mutations in the target sequence. All predictions were performed at 0.15 M Na<sup>+</sup>, 0 M Mg<sup>2+</sup>, and 22°C.

**G12C (G>T) mutation:**      **C**  
↑  
TGT

|                             |     |     |     |     |     |     |     |     |     |     |     |     |     |     |     |     |     |     |     |     |
|-----------------------------|-----|-----|-----|-----|-----|-----|-----|-----|-----|-----|-----|-----|-----|-----|-----|-----|-----|-----|-----|-----|
| <b>DNA sequence:</b>        | ATG | ACT | GAA | TAT | AAA | CTT | GTG | GTA | GTT | GGA | GCT | GGT | GGC | GTA | GGC | AAG | AGT | GCC | TTG | ACG |
| <b>Amino acid sequence:</b> | M   | T   | E   | Y   | K   | L   | V   | V   | V   | G   | A   | G   | G   | V   | G   | K   | S   | A   | L   | T   |
| <b>Codon number:</b>        | 1   | 2   | 3   | 4   | 5   | 6   | 7   | 8   | 9   | 10  | 11  | 12  | 13  | 14  | 15  | 16  | 17  | 18  | 19  | 20  |

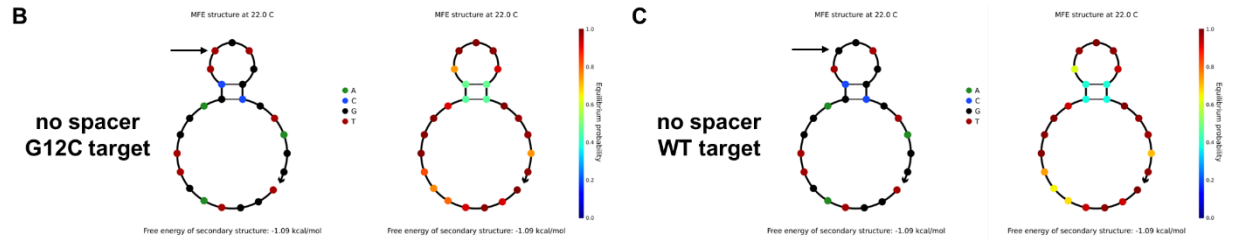

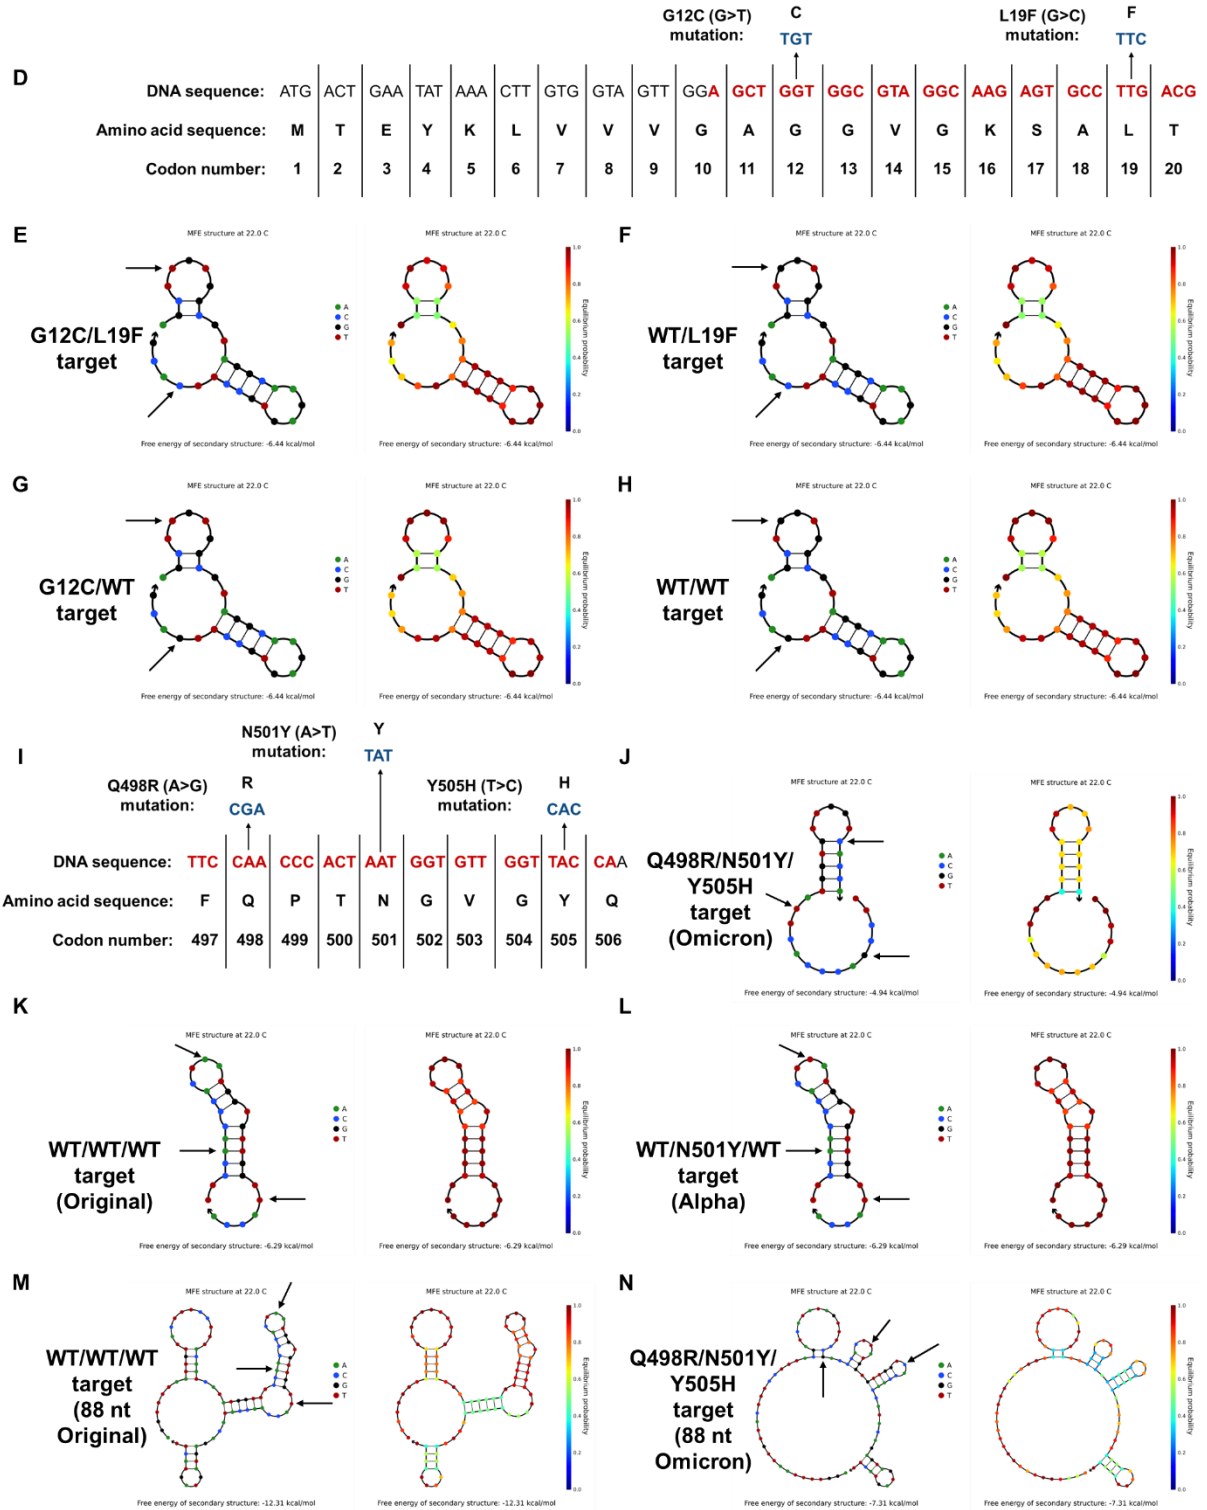

Supplementary Figure 2. Synthesis and purification of Atto647N-labeled targets.



(A) Reaction scheme for conjugation of 3' amine-modified oligonucleotides with NHS-Atto647N. (B) HPLC traces of the 3' Atto647N-labeled targets. (C) Reaction scheme for conjugation of 5' amine-modified oligonucleotides with NHS-Atto647N. (D) HPLC traces of the 5' Atto647N-labeled targets. Arrows represent the material collected from HPLC.

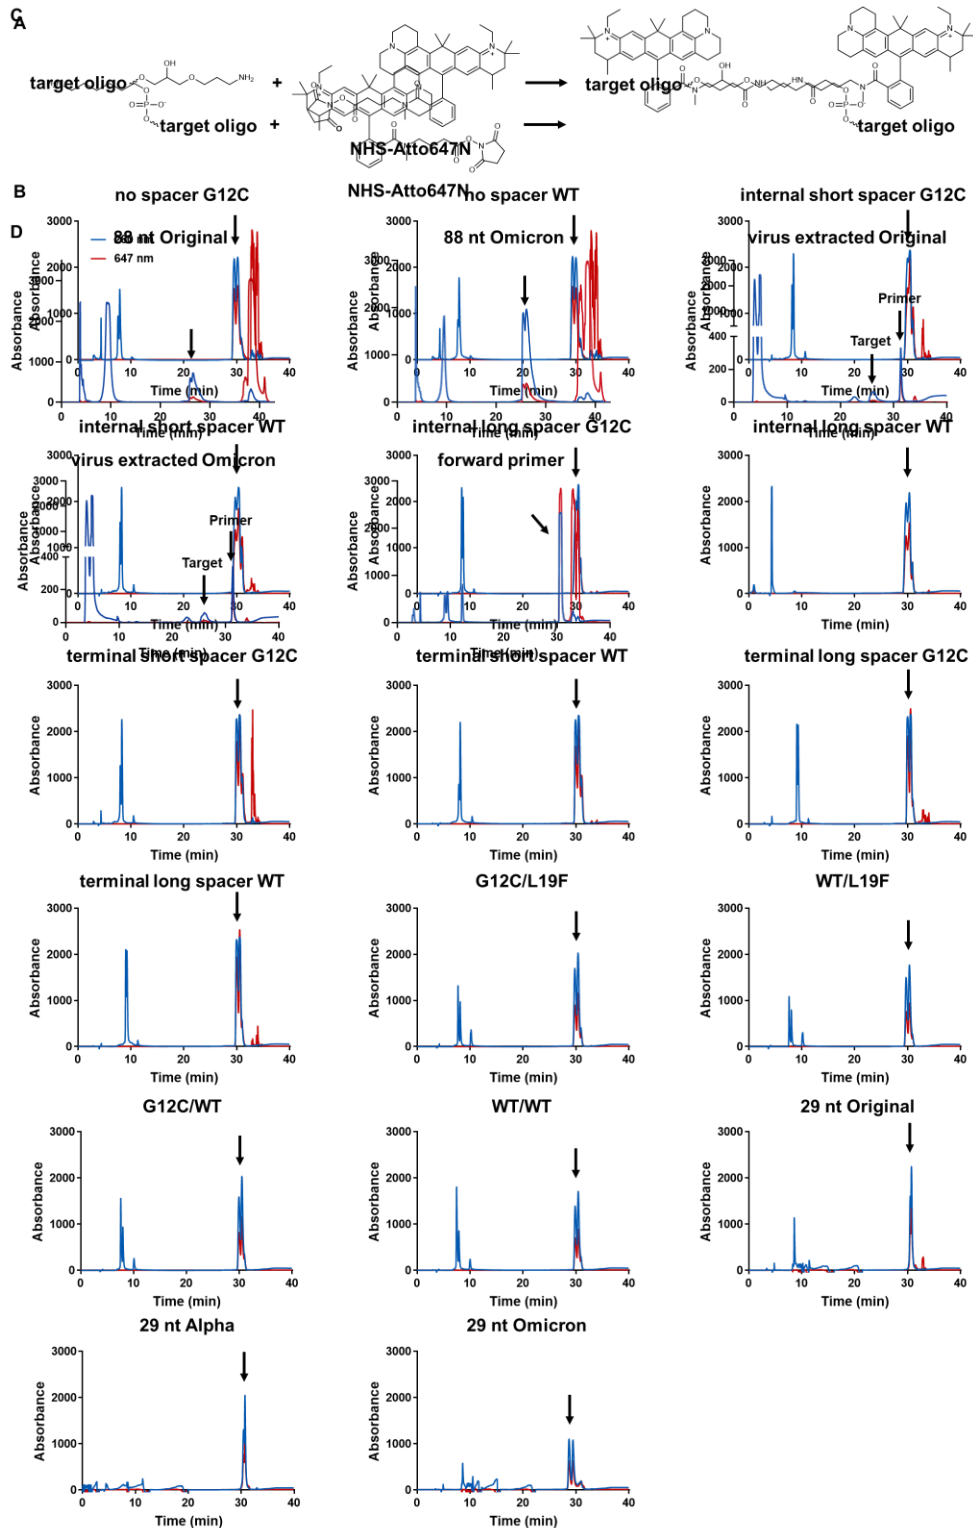

**Supplementary Figure 3. Mass spectrometry characterization of Atto647N-labeled targets.**

(A) Table of calculated masses, measured m/z values found, and difference in mass between calculated and measured masses of Atto647N-labeled targets. (B) Raw ESI mass spectra of Atto647N-labeled targets.

**A**

| Sample                     | Calculated mass (Da) | m/z found (Da) | Difference (Da) |
|----------------------------|----------------------|----------------|-----------------|
| no spacer G12C             | 8680.17              | 8679.72        | 0.45            |
| no spacer WT               | 8705.27              | 8704.72        | 0.55            |
| internal short spacer G12C | 8892.37              | 8891.76        | 0.61            |
| internal short spacer WT   | 8917.37              | 8916.76        | 0.61            |
| internal long spacer G12C  | 9024.47              | 9023.84        | 0.63            |
| internal long spacer WT    | 9049.57              | 9048.84        | 0.73            |
| terminal short spacer G12C | 8892.37              | 8891.75        | 0.62            |
| terminal short spacer WT   | 8917.37              | 8916.76        | 0.61            |
| terminal long spacer G12C  | 9024.47              | 9023.83        | 0.64            |
| terminal long spacer WT    | 9049.57              | 9048.84        | 0.73            |
| G12C/L19F                  | 10432.37             | 10431.01       | 1.36            |
| WT/L19F                    | 10457.37             | 10457.02       | 0.35            |
| G12C/WT                    | 10472.37             | 10472.02       | 0.35            |
| WT/WT                      | 10497.37             | 10497.03       | 0.34            |
| 29 nt Original             | 9667.87              | 9667.43        | 0.44            |
| 29 nt Alpha                | 9658.87              | 9658.41        | 0.46            |
| 29 nt Omicron              | 9659.87              | 9659.41        | 0.46            |
| 88 nt Original             | 27826.67             | 27827.96       | -1.29           |
| 88 nt Omicron              | 27818.67             | 27817.95       | 0.72            |

**B**

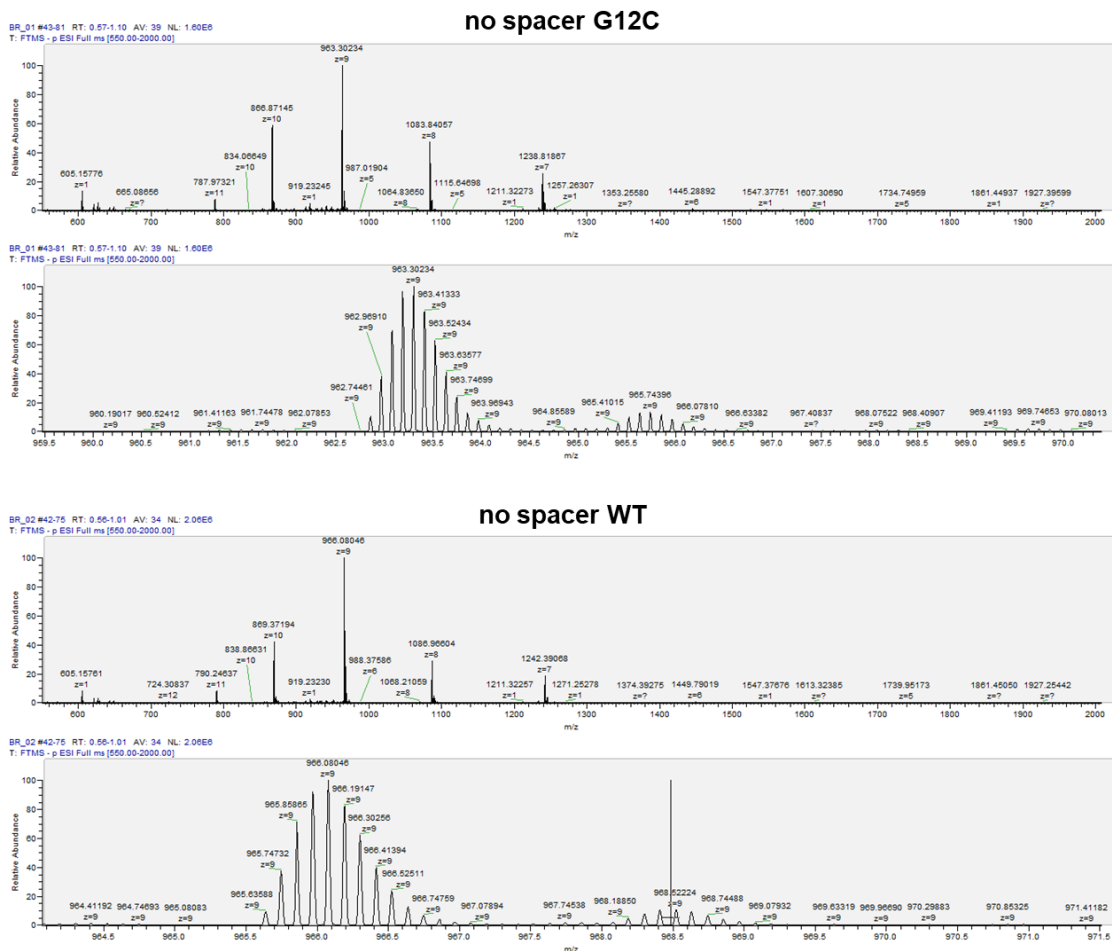

### internal short spacer G12C

BR\_03 #07-02 RT: 0.48-1.11 AV: 46 NL: 7.46E5  
T: FTMS - p ESI Full ms [550.00-2000.00]

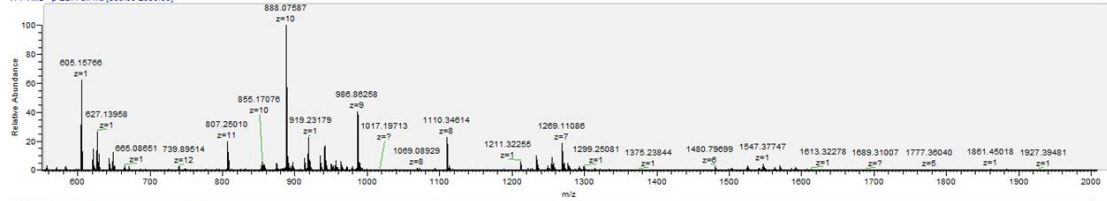

BR\_03 #07-02 RT: 0.48-1.11 AV: 46 NL: 7.46E5  
T: FTMS - p ESI Full ms [550.00-2000.00]

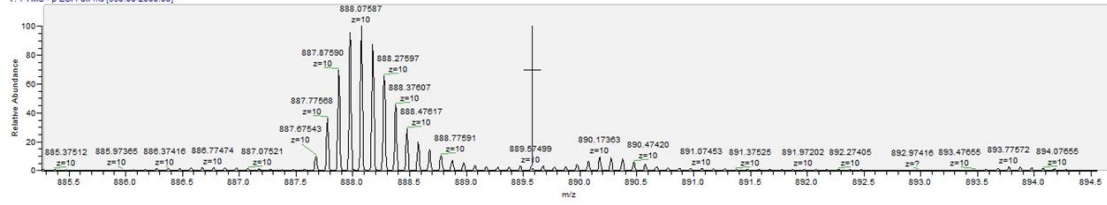

### internal short spacer WT

BR\_04 #06-02 RT: 0.48-1.11 AV: 47 NL: 9.33E5  
T: FTMS - p ESI Full ms [550.00-2000.00]

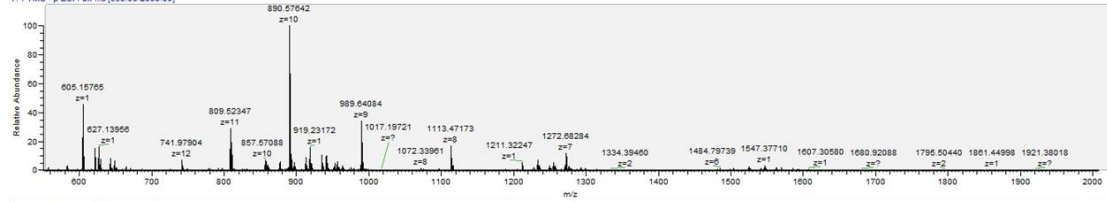

BR\_04 #06-02 RT: 0.48-1.11 AV: 47 NL: 9.33E5  
T: FTMS - p ESI Full ms [550.00-2000.00]

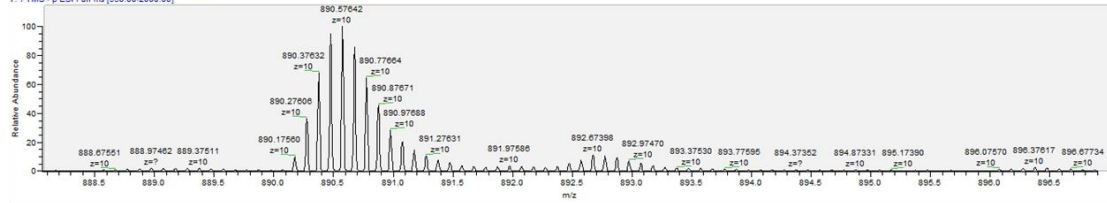

### internal long spacer G12C

BR\_05 #06-02 RT: 0.48-1.11 AV: 47 NL: 1.10E6  
T: FTMS - p ESI Full ms [550.00-2000.00]

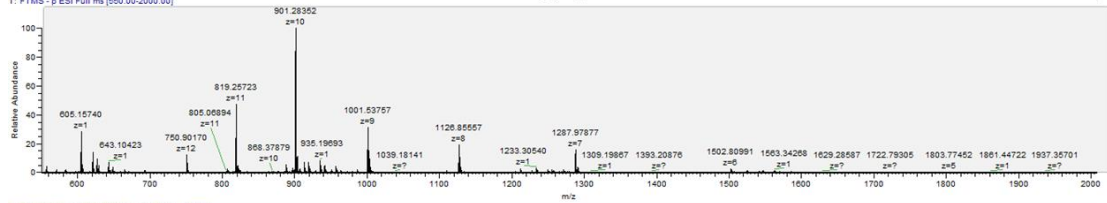

BR\_05 #06-02 RT: 0.48-1.11 AV: 47 NL: 1.10E6  
T: FTMS - p ESI Full ms [550.00-2000.00]

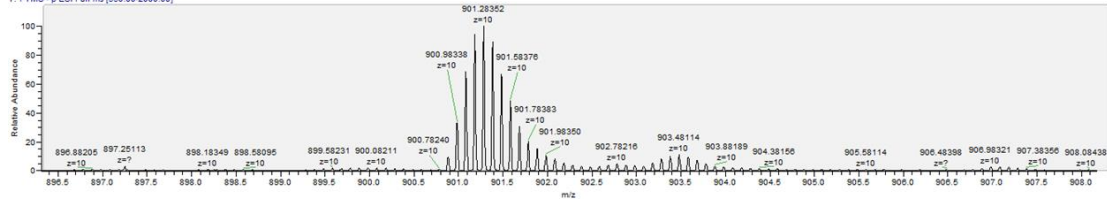

BR\_06#28-88 RT: 0.37-1.19 AV: 61 NL: 1.04E6  
T: FTMS - p ESI Full ms [500.00-2000.00]

### internal long spacer WT

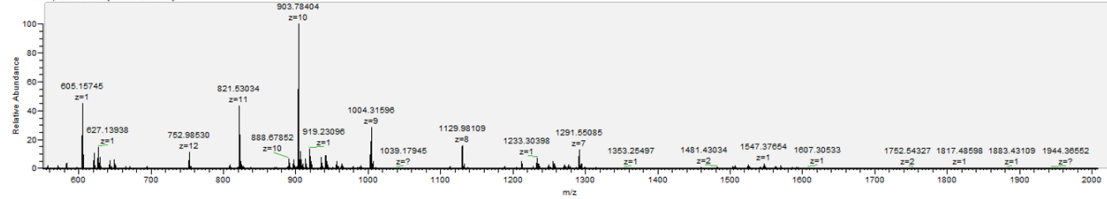

BR\_06#28-88 RT: 0.37-1.19 AV: 61 NL: 1.04E6  
T: FTMS - p ESI Full ms [500.00-2000.00]

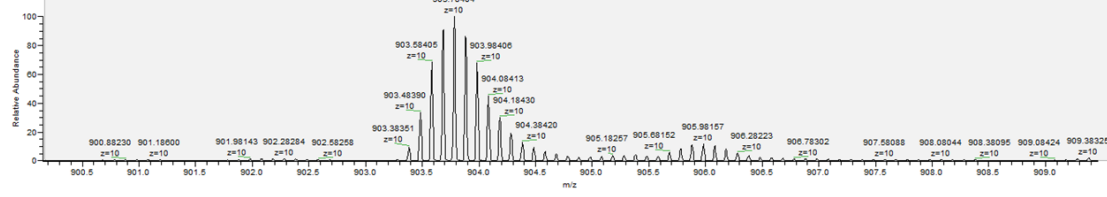

BR\_07#21-89 RT: 0.27-0.93 AV: 49 NL: 4.47E5  
T: FTMS - p ESI Full ms [500.00-2000.00]

### terminal short spacer G12C

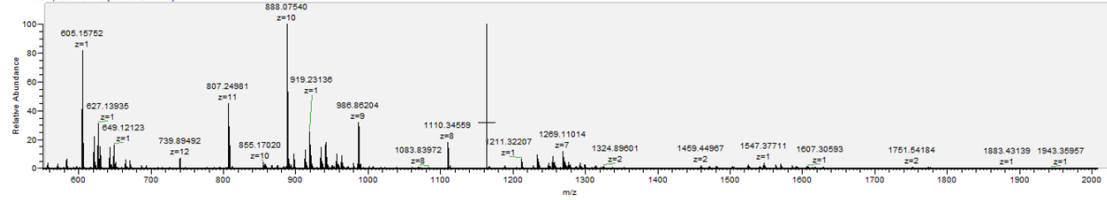

BR\_07#21-89 RT: 0.27-0.93 AV: 49 NL: 4.47E5  
T: FTMS - p ESI Full ms [500.00-2000.00]

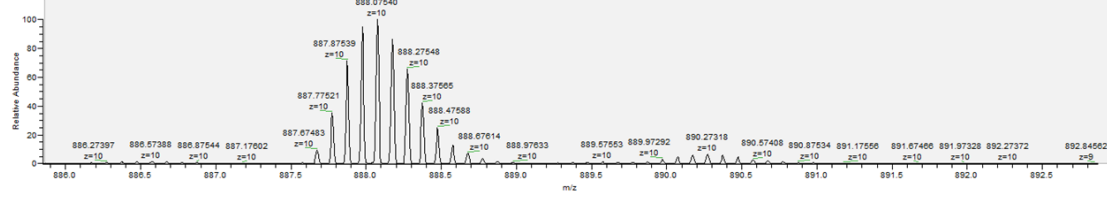

BR\_08#37-91 RT: 0.49-1.23 AV: 55 NL: 8.59E5  
T: FTMS - p ESI Full ms [500.00-2000.00]

### terminal short spacer WT

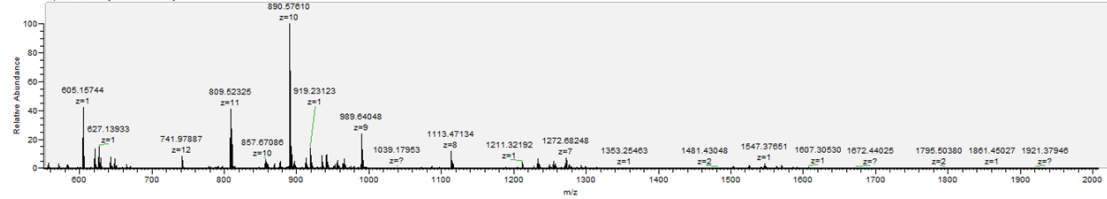

BR\_08#37-91 RT: 0.49-1.23 AV: 55 NL: 8.59E5  
T: FTMS - p ESI Full ms [500.00-2000.00]

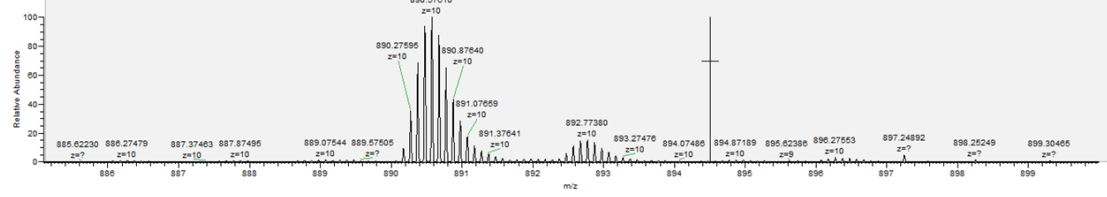

### terminal long spacer G12C

BR\_09 #26-43 RT: 0.34-0.57 AV: 18 NL: 8.21E5  
T: FTMS - p ESI Full ms [500.00-2000.00]

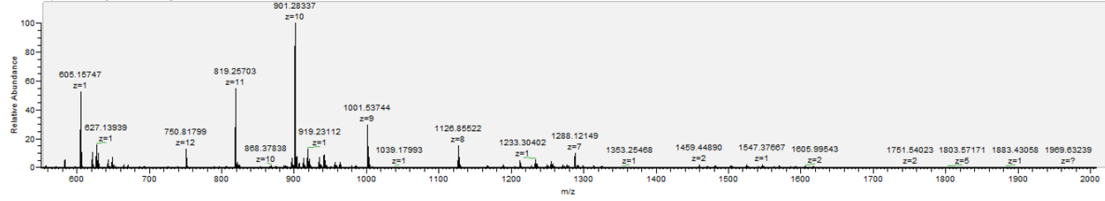

BR\_09 #26-43 RT: 0.34-0.57 AV: 18 NL: 8.21E5  
T: FTMS - p ESI Full ms [500.00-2000.00]

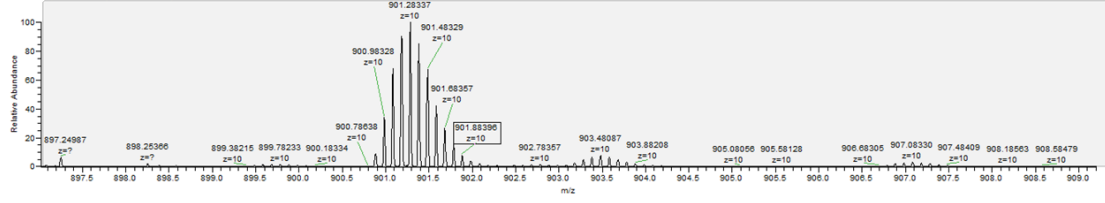

### terminal long spacer WT

BR\_10 #26-81 RT: 0.34-1.09 AV: 56 NL: 1.32E6  
T: FTMS - p ESI Full ms [500.00-2000.00]

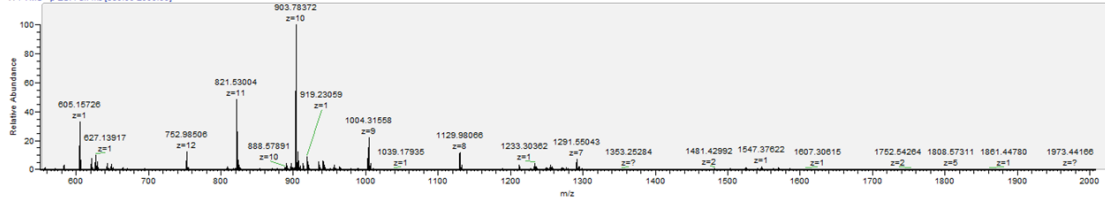

BR\_10 #26-81 RT: 0.34-1.09 AV: 56 NL: 1.32E6  
T: FTMS - p ESI Full ms [500.00-2000.00]

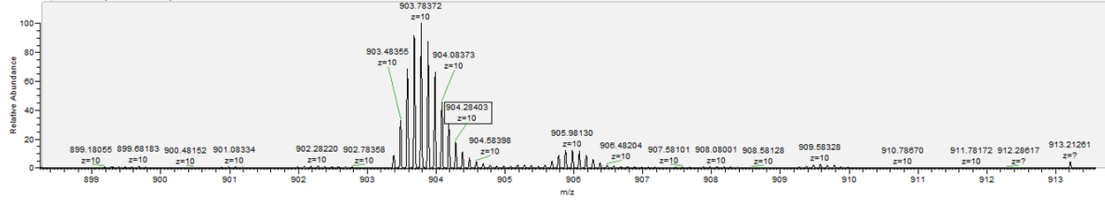

### G12C/L19F

BR\_11 #32-77 RT: 0.42-1.04 AV: 46 NL: 1.11E6  
T: FTMS - p ESI Full ms [500.00-2000.00]

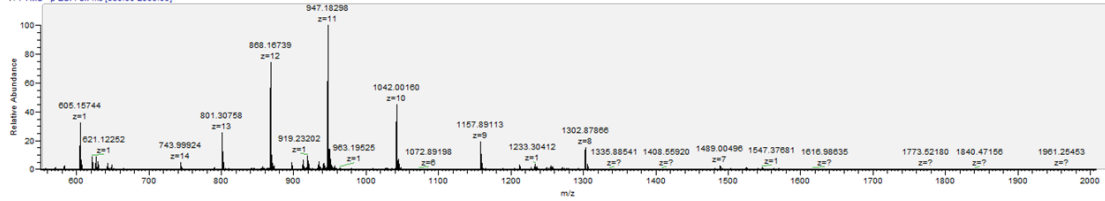

BR\_11 #32-77 RT: 0.42-1.04 AV: 46 NL: 1.11E6  
T: FTMS - p ESI Full ms [500.00-2000.00]

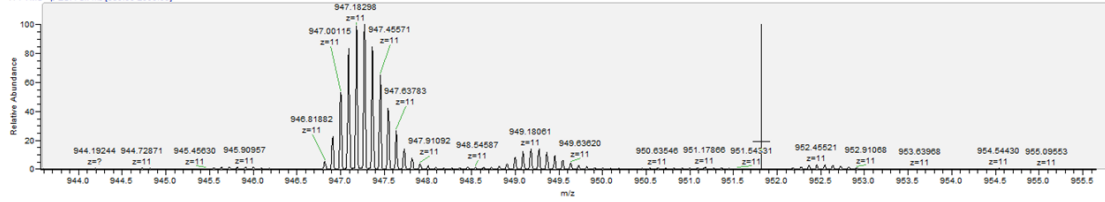

### WT/L19F

BR\_12#03-90 RT: 0.37-1.08 AV: 53 NL: 6.92E5  
T: FTMS - p ESI Full ms [500.00-2000.00]

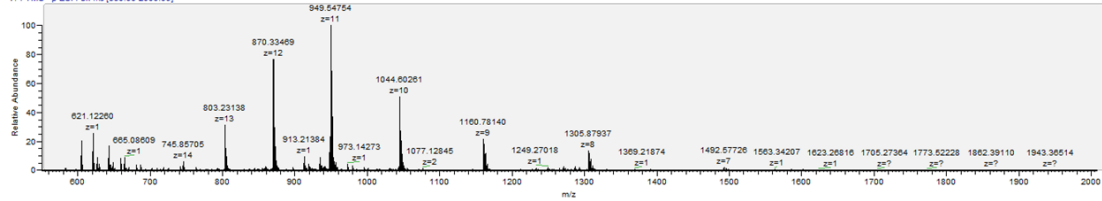

BR\_12#03-90 K1: 0.37-1.08 AV: 53 NL: 6.92E5  
T: FTMS - p ESI Full ms [500.00-2000.00]

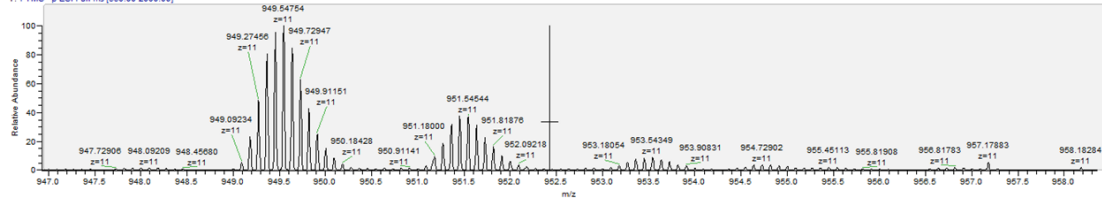

### G12C/WT

BR\_13#33-95 RT: 0.44-1.29 AV: 63 NL: 1.10E6  
T: FTMS - p ESI Full ms [500.00-2000.00]

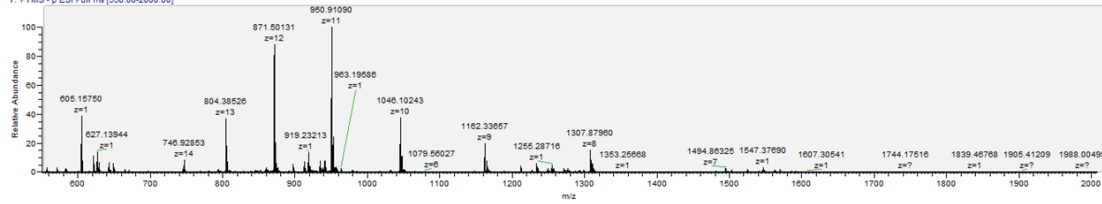

BR\_13#33-95 RT: 0.44-1.29 AV: 63 NL: 1.10E6  
T: FTMS - p ESI Full ms [500.00-2000.00]

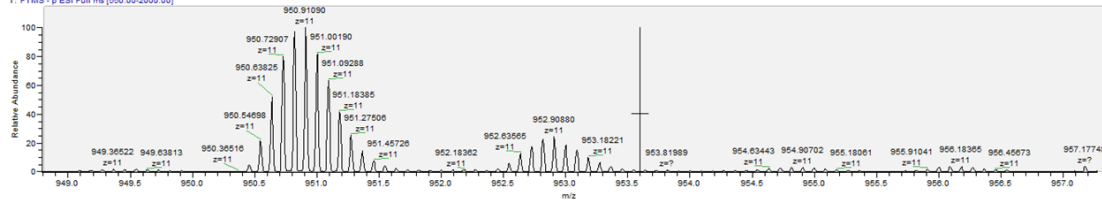

### WT/WT

BR\_14#97-85 RT: 0.49-1.15 AV: 49 NL: 1.08E6  
T: FTMS - p ESI Full ms [500.00-2000.00]

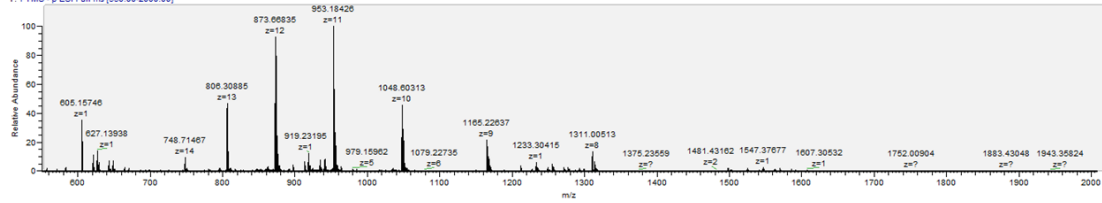

BR\_14#97-85 RT: 0.49-1.15 AV: 49 NL: 1.08E6  
T: FTMS - p ESI Full ms [500.00-2000.00]

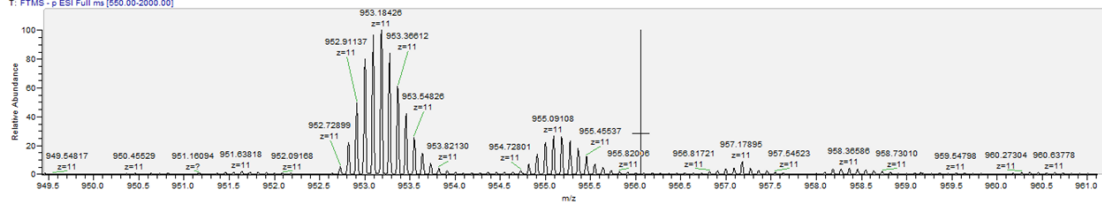

### 29 nt Original

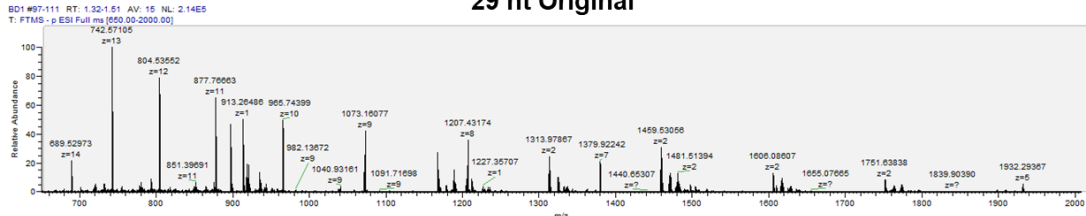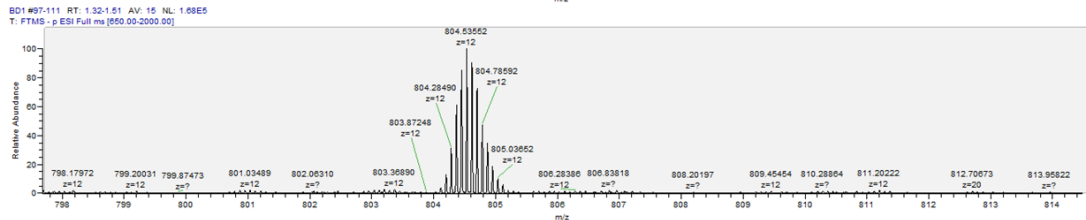

### 29 nt Alpha

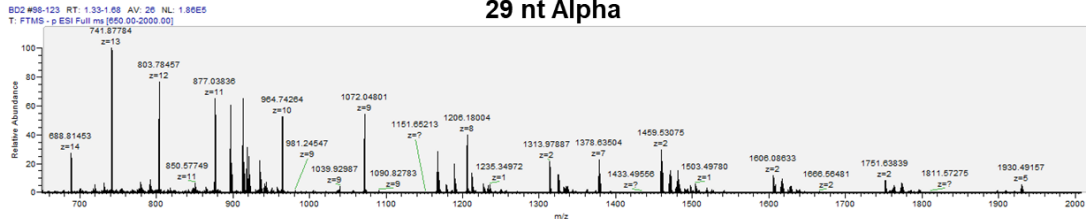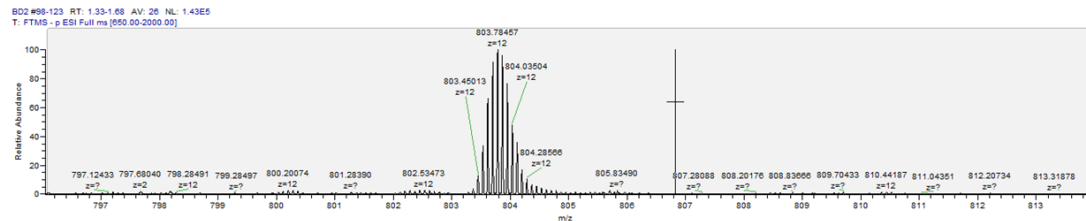

### 29 nt Omicron

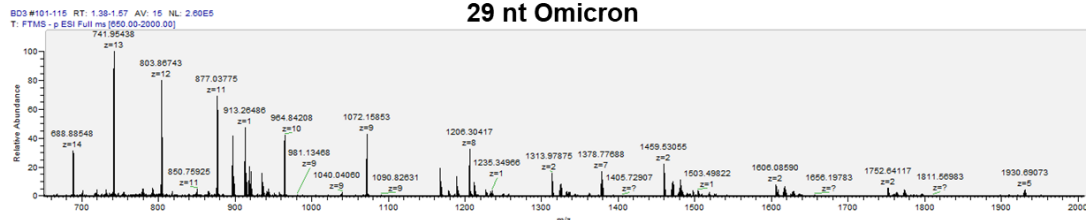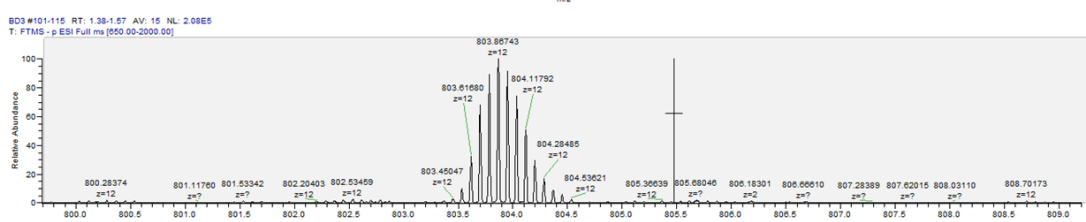



### 88 nt Original

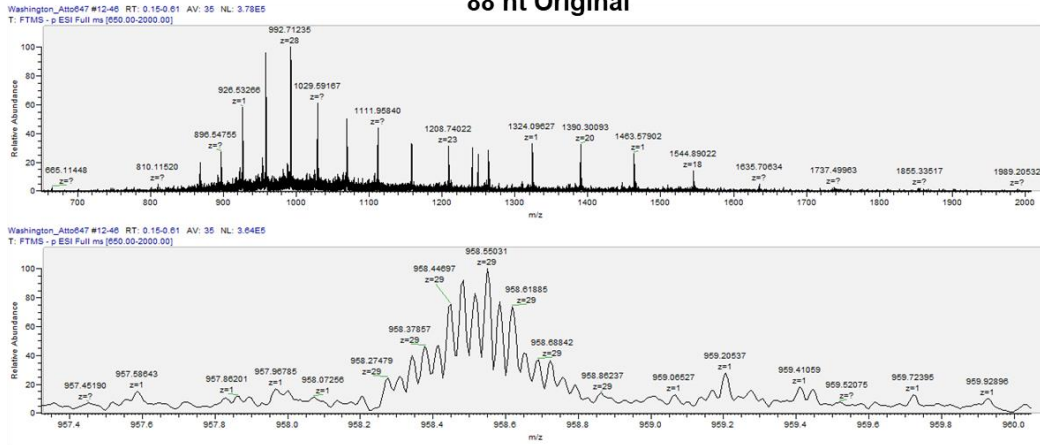

### 88 nt Omicron

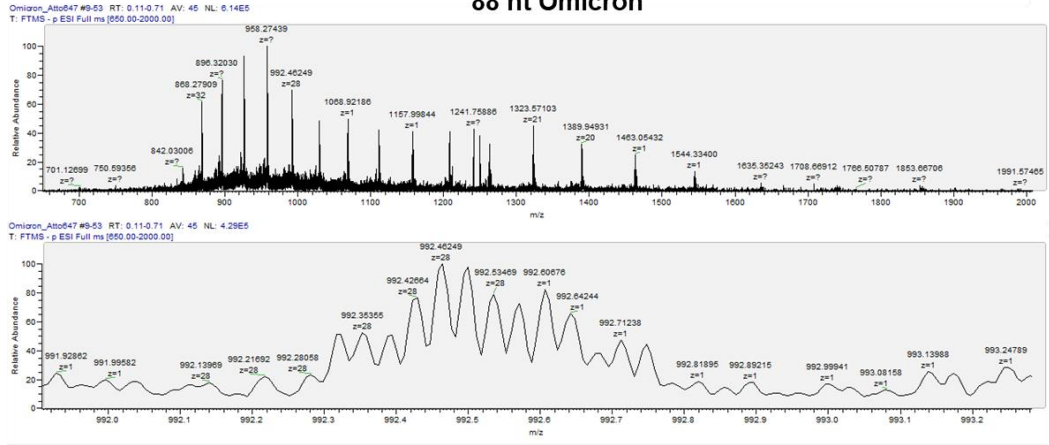

### Supplementary Figure 4. Synthesis of DNA-functionalized silica particles.

Scheme describing the synthesis of DNA-functionalized silica particles. On top is a simplified summary of the synthesis, whereas the boxes on the bottom provide further synthetic details and structures of the reagents used. Refer to methods section “Synthesis of DNA-functionalized silica particles” for a complete description of the synthesis.

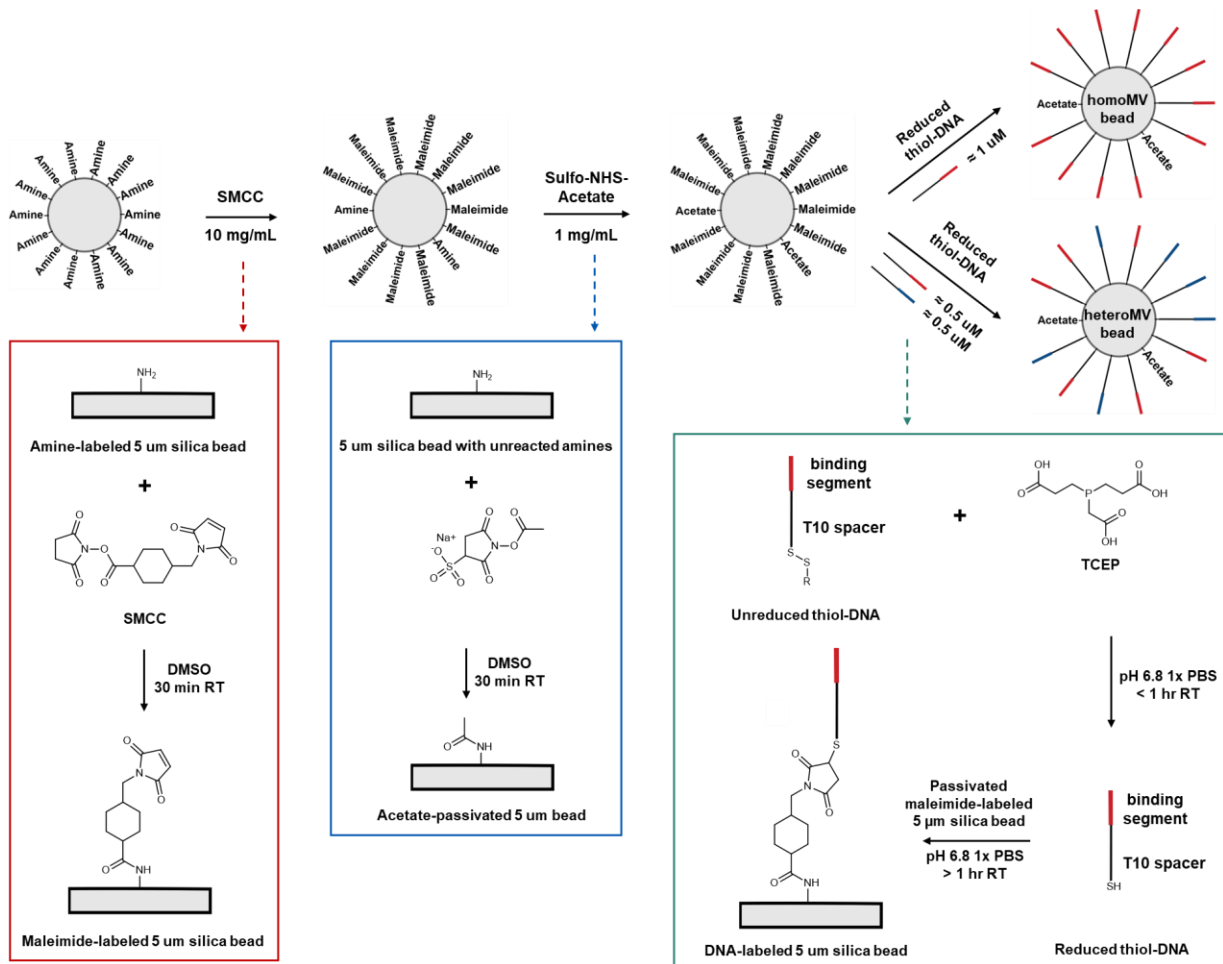

**Supplementary Figure 5. Flow cytometry gating strategy to isolate singlet beads for analysis.**

(A) For each sample, all events are first plotted on a side scatter area vs forward scatter area plot and a “singlets area” gate is drawn to approximately include just the singlet bead population. (B) The cells included in the “singlets area” gate are then plotted on a side scatter height vs forward scatter height plot and a second gate, the “singlets height” gate, is drawn to more accurately include just the singlet bead population. The cells included in the “singlets height” gate are then used as the final singlet bead population shown in the representative histograms and from which the median fluorescence intensity values were calculated.

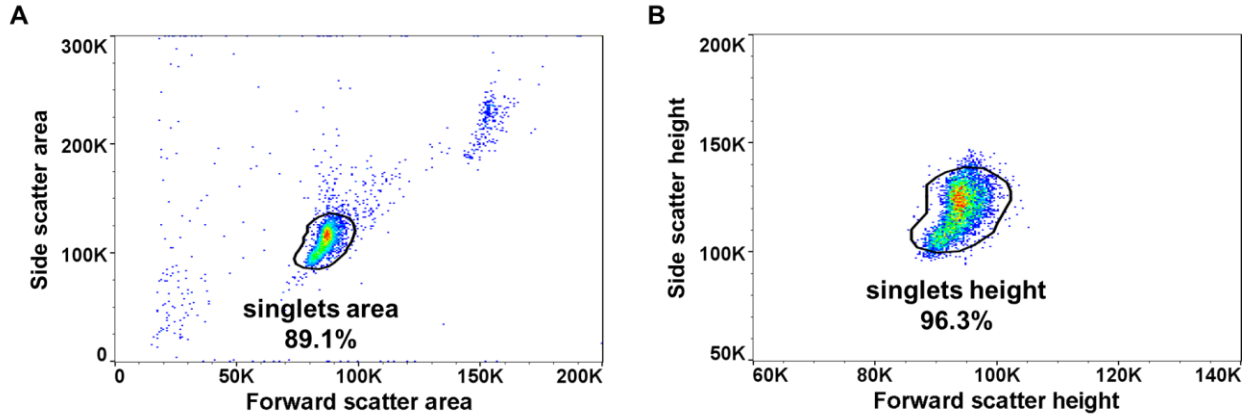

**Supplementary Figure 6. Fluorescence microscopy images of beads hybridized to target.** Brightfield and epifluorescence microscopy images of full-length complement beads hybridized to 1 nM of Atto647N-labeled Omicron target or no target. Images shown are representative images obtained from a single independent experiment.

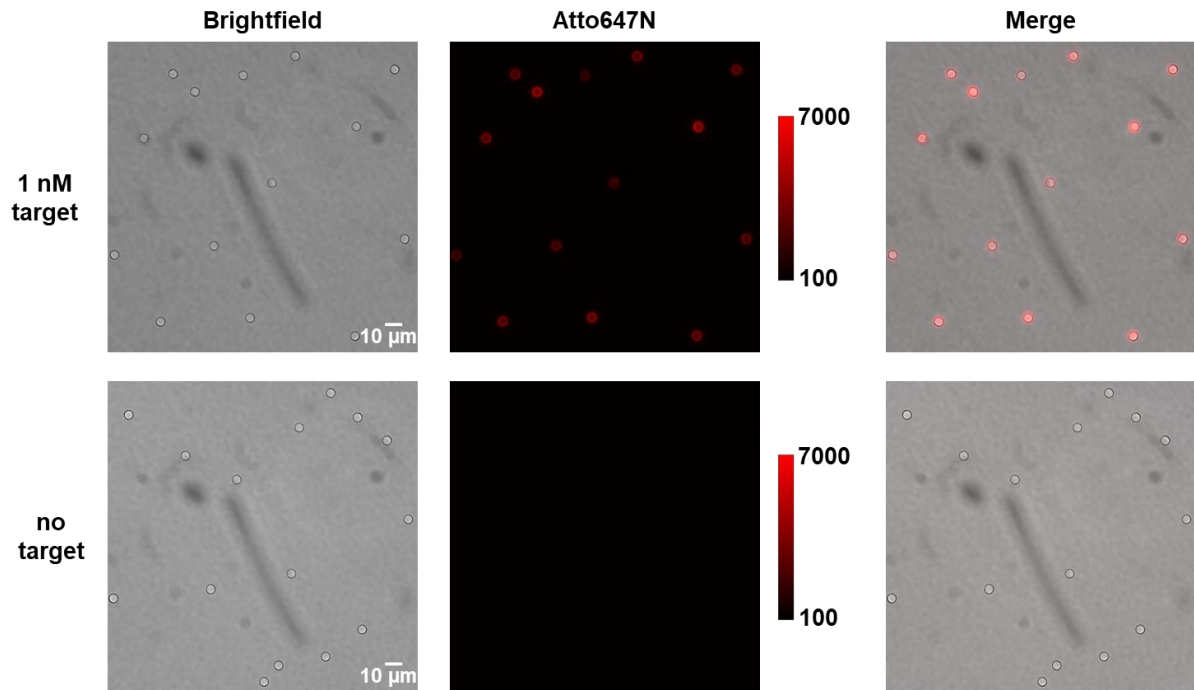

**Supplementary Table 1. Average median fluorescence intensity  $\pm$  standard error of the mean values for all bead combinations binding no spacer G12C target.**

The median fluorescence intensity of the no spacer G12C target binding to each bead combination was measured in three independent experiments. The table below shows the calculated average and standard error of the mean for the three median fluorescence intensity values.

|             | <b>No S</b>      | <b>7S</b>        | <b>8S</b>          | <b>9S</b>          | <b>10S</b>         | <b>11S</b>        |
|-------------|------------------|------------------|--------------------|--------------------|--------------------|-------------------|
| <b>No T</b> | 59 $\pm$ 4       | 154 $\pm$ 13     | 517 $\pm$ 73       | 4522 $\pm$ 540     | 15126 $\pm$ 1789   | 35194 $\pm$ 935   |
| <b>4T</b>   | 54 $\pm$ 2       | 120 $\pm$ 6      | 472 $\pm$ 33       | 4939 $\pm$ 328     | 22647 $\pm$ 423    | 34573 $\pm$ 1503  |
| <b>5T</b>   | 93 $\pm$ 10      | 161 $\pm$ 26     | 1076 $\pm$ 78      | 8951 $\pm$ 560     | 14087 $\pm$ 589    | 40989 $\pm$ 10285 |
| <b>6T</b>   | 106 $\pm$ 2      | 298 $\pm$ 19     | 1779 $\pm$ 89      | 15111 $\pm$ 396    | 42858 $\pm$ 1714   | 62873 $\pm$ 2816  |
| <b>7T</b>   | 235 $\pm$ 13     | 424 $\pm$ 33     | 3658 $\pm$ 256     | 20935 $\pm$ 2115   | 51019 $\pm$ 5841   | 68290 $\pm$ 1784  |
| <b>8T</b>   | 2369 $\pm$ 118   | 10610 $\pm$ 920  | 53619 $\pm$ 7605   | 81596 $\pm$ 9674   | 97022 $\pm$ 8979   | 125280 $\pm$ 4197 |
| <b>9T</b>   | 14828 $\pm$ 1224 | 28731 $\pm$ 5128 | 76229 $\pm$ 16169  | 112663 $\pm$ 27240 | 195151 $\pm$ 22429 | 154005 $\pm$ 4026 |
| <b>10T</b>  | 13744 $\pm$ 1450 | 81537 $\pm$ 4328 | 148605 $\pm$ 14991 | 213091 $\pm$ 9045  | 205227 $\pm$ 5447  | 176200 $\pm$ 2110 |

**Supplementary Table 2. Average median fluorescence intensity  $\pm$  standard error of the mean values for all bead combinations binding no spacer WT target.**

The median fluorescence intensity of the no spacer WT target binding to each bead combination was measured in three independent experiments. The table below shows the calculated average and standard error of the mean for the three median fluorescence intensity values.

|             | <b>No S</b>      | <b>7S</b>       | <b>8S</b>        | <b>9S</b>         | <b>10S</b>         | <b>11S</b>         |
|-------------|------------------|-----------------|------------------|-------------------|--------------------|--------------------|
| <b>No T</b> | 56 $\pm$ 4       | 64 $\pm$ 1      | 72 $\pm$ 3       | 174 $\pm$ 12      | 661 $\pm$ 97       | 24728 $\pm$ 962    |
| <b>4T</b>   | 61 $\pm$ 7       | 64 $\pm$ 3      | 74 $\pm$ 3       | 213 $\pm$ 20      | 909 $\pm$ 72       | 21385 $\pm$ 1218   |
| <b>5T</b>   | 109 $\pm$ 10     | 75 $\pm$ 9      | 113 $\pm$ 4      | 251 $\pm$ 14      | 1225 $\pm$ 78      | 29084 $\pm$ 6095   |
| <b>6T</b>   | 125 $\pm$ 1      | 118 $\pm$ 3     | 170 $\pm$ 5      | 475 $\pm$ 21      | 4040 $\pm$ 346     | 50386 $\pm$ 2148   |
| <b>7T</b>   | 208 $\pm$ 19     | 139 $\pm$ 4     | 277 $\pm$ 11     | 647 $\pm$ 121     | 7234 $\pm$ 404     | 62561 $\pm$ 1675   |
| <b>8T</b>   | 1955 $\pm$ 635   | 2262 $\pm$ 117  | 2826 $\pm$ 58    | 10898 $\pm$ 2346  | 81904 $\pm$ 7503   | 124810 $\pm$ 3137  |
| <b>9T</b>   | 13597 $\pm$ 2110 | 8693 $\pm$ 1292 | 9635 $\pm$ 1436  | 60413 $\pm$ 8188  | 159425 $\pm$ 13751 | 154441 $\pm$ 13439 |
| <b>10T</b>  | 18205 $\pm$ 1140 | 25845 $\pm$ 523 | 38530 $\pm$ 3431 | 130354 $\pm$ 5038 | 166468 $\pm$ 18349 | 166092 $\pm$ 14714 |

**Supplementary Table 3. Average discrimination factor  $\pm$  standard error of the mean values for all bead combinations binding no spacer targets.**

The median fluorescence intensity of the no spacer G12C (**Supplementary Table 1**) and WT (**Supplementary Table 2**) targets binding to each bead combination was measured in three independent experiments. The discrimination factor was calculated for each independent replicate by dividing the G12C MFI value by the WT MFI value. The table below shows the calculated average and standard error of the mean for the three discrimination factor values.

|             | <b>No S</b>   | <b>7S</b>     | <b>8S</b>      | <b>9S</b>      | <b>10S</b>     | <b>11S</b>    |
|-------------|---------------|---------------|----------------|----------------|----------------|---------------|
| <b>No T</b> | 1.0 $\pm$ 0.0 | 2.4 $\pm$ 0.2 | 7.2 $\pm$ 0.8  | 25.9 $\pm$ 1.4 | 23.2 $\pm$ 2.0 | 1.4 $\pm$ 0.1 |
| <b>4T</b>   | 0.9 $\pm$ 0.1 | 1.9 $\pm$ 0.1 | 6.4 $\pm$ 0.3  | 23.3 $\pm$ 0.6 | 25.2 $\pm$ 2.0 | 1.6 $\pm$ 0.0 |
| <b>5T</b>   | 0.8 $\pm$ 0.0 | 2.1 $\pm$ 0.2 | 9.5 $\pm$ 0.7  | 35.6 $\pm$ 1.4 | 11.5 $\pm$ 0.3 | 1.4 $\pm$ 0.1 |
| <b>6T</b>   | 0.8 $\pm$ 0.0 | 2.5 $\pm$ 0.2 | 10.5 $\pm$ 0.8 | 31.8 $\pm$ 0.6 | 10.7 $\pm$ 0.5 | 1.2 $\pm$ 0.0 |
| <b>7T</b>   | 1.2 $\pm$ 0.1 | 3.1 $\pm$ 0.3 | 13.2 $\pm$ 0.6 | 33.9 $\pm$ 4.4 | 7.1 $\pm$ 0.8  | 1.1 $\pm$ 0.0 |
| <b>8T</b>   | 1.8 $\pm$ 1.0 | 4.7 $\pm$ 0.2 | 18.9 $\pm$ 2.3 | 8.0 $\pm$ 1.3  | 1.2 $\pm$ 0.2  | 1.0 $\pm$ 0.0 |
| <b>9T</b>   | 1.1 $\pm$ 0.2 | 3.3 $\pm$ 0.3 | 7.9 $\pm$ 1.1  | 1.8 $\pm$ 0.2  | 1.2 $\pm$ 0.1  | 1.0 $\pm$ 0.1 |
| <b>10T</b>  | 0.8 $\pm$ 0.0 | 3.2 $\pm$ 0.2 | 3.9 $\pm$ 0.6  | 1.6 $\pm$ 0.0  | 1.3 $\pm$ 0.1  | 1.1 $\pm$ 0.1 |

**Supplementary Table 4. Average cooperativity factor  $\pm$  standard error of the mean values for all bead combinations binding no spacer G12C target.**

The median fluorescence intensity of the no spacer G12C (**Supplementary Table 1**) target binding to each bead combination was measured in three independent experiments. The average cooperativity factor was calculated by dividing the average  $n=2$  MFI by the average of the average corresponding  $n=1$  MFIs. The standard error of the mean was calculated by propagating the SEMs from the three independent MFI measurements for the  $n=2$  beads and the  $n=1$  beads. The table below shows the calculated average cooperativity factor and standard error of the mean.

|            | <b>7S</b>      | <b>8S</b>      | <b>9S</b>      | <b>10S</b>     | <b>11S</b>    |
|------------|----------------|----------------|----------------|----------------|---------------|
| <b>4T</b>  | 1.2 $\pm$ 0.1  | 1.7 $\pm$ 0.2  | 2.2 $\pm$ 0.3  | 3.0 $\pm$ 0.4  | 2.0 $\pm$ 0.1 |
| <b>5T</b>  | 1.3 $\pm$ 0.2  | 3.5 $\pm$ 0.5  | 3.9 $\pm$ 0.5  | 1.9 $\pm$ 0.2  | 2.3 $\pm$ 0.6 |
| <b>6T</b>  | 2.3 $\pm$ 0.2  | 5.7 $\pm$ 0.7  | 6.5 $\pm$ 0.8  | 5.6 $\pm$ 0.7  | 3.6 $\pm$ 0.2 |
| <b>7T</b>  | 2.2 $\pm$ 0.2  | 9.7 $\pm$ 1.2  | 8.8 $\pm$ 1.3  | 6.6 $\pm$ 1.1  | 3.9 $\pm$ 0.1 |
| <b>8T</b>  | 8.4 $\pm$ 0.8  | 37.2 $\pm$ 5.6 | 23.7 $\pm$ 3.4 | 11.1 $\pm$ 1.5 | 6.7 $\pm$ 0.3 |
| <b>9T</b>  | 3.8 $\pm$ 0.8  | 9.9 $\pm$ 2.3  | 11.6 $\pm$ 2.9 | 13.0 $\pm$ 1.8 | 6.2 $\pm$ 0.2 |
| <b>10T</b> | 11.7 $\pm$ 1.4 | 20.8 $\pm$ 3.0 | 23.3 $\pm$ 2.2 | 14.2 $\pm$ 1.2 | 7.2 $\pm$ 0.3 |
